# Supplementary material
Source: PubMed Central journal article supplement (PMC2889056)
Supplement: 0913547107_pnas.0913547107_SI.pdf [file 0913547107_pnas.0913547107_SI.pdf]

# Supporting Information

Gipson et al. 10.1073/pnas.0913547107

## SI Text

- Ludtke SJ, Baldwin PR, Chiu W (1999) EMAN: Semiautomated software for high-resolution single-particle reconstructions. *J Struct Biol* 128:82–97.
- Böttcher B, Wynne SA, Crowther RA (1997) Determination of the fold of the core protein of hepatitis B virus by electron cryomicroscopy. *Nature* 386:88–91.
- Rosenthal P, Henderson R (2003) Optimal determination of particle orientation, absolute hand, and contrast loss in single-particle electron cryomicroscopy. *J Mol Biol* 333:721–745.
- Johansson P, et al. (2008) Inhibition of the fungal fatty acid synthase type I multi-enzyme complex. *Proc Natl Acad Sci USA* 105(35):12803–12808.
- Jenni S, et al. (2007) Structure of fungal fatty acid synthase and implications for iterative substrate shuttling. *Science* 316:254–261.
- Johansson P, et al. (2009) Multimeric options for the auto-activation of the fungal FAS type I megasynthase. *Structure* 17(8):1063–1074.
- Kelley LA, Sternberg MJ (2009) Protein structure prediction on the Web: A case study using the Phyre server. *Nat Protoc* 4:363–371.

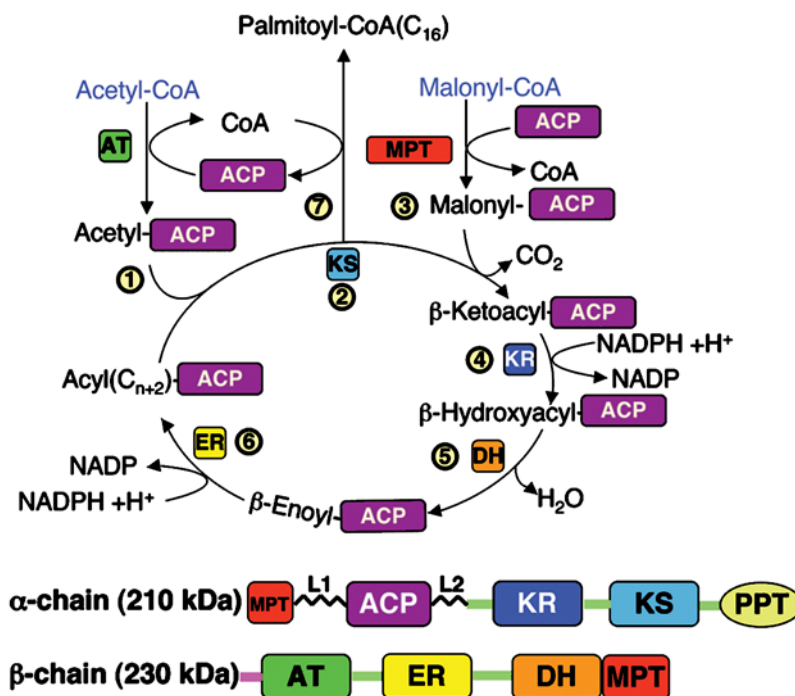

**Fig. S1.** Fatty acid synthesis reaction cycle. The coloring scheme for domains is the one used in the main figures. Numbers denote the steps in the fatty acid chain elongation cycle as follows: (1)(3) acetyl/malonyl transfer; (2) condensation; (4) ketoacyl reduction; (5) dehydration; (6) enoyl reduction.











ACP movement in 3 reaction chambers of yeast FAS

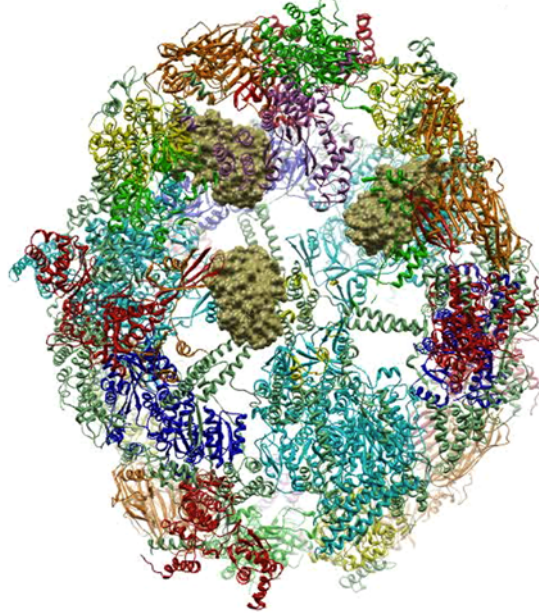

**Movie S2.** The positions of the ACP domain docked at the AT (green), ER (yellow), KS (cyan), and KR (blue) catalytic domains inside the three reaction chambers in one dome of yeast FAS. The ACP domain is colored corresponding to the catalytic domain it is docked to.

[Movie S2 \(MPG\)](#)
